# Supplementary material for: Anti-p200 Pemphigoid: A Systematic Review
Source: Front Immunol. 2019 Oct 22;10:2466. doi: 10.3389/fimmu.2019.02466 (PMC6817563; doi:10.3389/fimmu.2019.02466)
Supplement: Supplementary file 1 [file Table_1.docx]

**Supplementary table 1-** Literature search strategy for each one the databases examined

| **Literature search scheme for OVID Medline (97 results)**  **Search String:** |
| --- |
| | #11 | Search (#9 OR #10) | | --- | --- | | #10 | Search dermal 200 kD antigen | | #9 | Search (#1 AND #8) | | #8 | Search (#2 OR #3 OR #4 OR #5 OR #6 OR #7) | | #7 | Search ((LAMC1-protein[Text Word] OR LAMC1 protein[Text Word]) OR LAMC1) | | #6 | Search ((Anti-laminin gamma1) OR (Antilaminin gamma1) OR Antilaminin-gamma1 OR Anti-laminin-gamma1 OR "Anti-laminin-gamma 1") OR (Anti-laminin "gamma 1") OR (Antilaminin "gamma 1") OR (Antilaminin gamma-1) OR (Antil-aminin gamma-1)) | | #5 | Search ("laminin gamma1"[Text Word] OR "laminin-gamma1"[Text Word] OR "laminin gamma-1"[Text Word] OR "laminin gamma 1"[Text Word] OR "laminin-gamma 1"[Text Word] OR laminin-gamma-1 OR) | | #4 | Search laminin gamma 1[Supplementary Concept] | | #3 | Search (Anti-p200[Text Word] OR "Anti-p 200"[Text Word]) | | #2 | Search (p-200[Text Word] OR p200[Text Word] OR "p 200"[Text Word]) | | #1 | Search pemphigoid[Title/Abstract] | |
| **Literature search scheme for Embase (134 results)**  **Search String:** |
| | #3 OR #9 | #10 | | --- | --- | | #1 AND #8 | #9 | | #2 OR #4 OR #5 OR #6 OR #7 | #8 | | 'lamc1':ab,ti | #7 | | ((laminin NEAR/1 γ1):ab,ti) OR (('anti laminin' NEAR/1 γ1):ab,ti) OR ((antilaminin NEAR/1 γ1):ab,ti) OR ((laminin NEAR/1 'γ 1'):ab,ti) OR ((antilaminin NEAR/1 'γ 1'):ab,ti) OR (('anti laminin' NEAR/1 'γ 1'):ab,ti) | #6 | | (('anti laminin' NEAR/1 gamma1):ab,ti) OR ((antilaminin NEAR/1 gamma1):ab,ti) OR (('anti laminin' NEAR/1 'gamma 1'):ab,ti) OR ((antilaminin NEAR/1 'gamma 1'):ab,ti) | #5 | | ((laminin NEAR/1 'gamma 1'):ab,ti) OR ((laminin NEAR/1 gamma1):ab,ti) | #4 | | 200 AND kd AND dermal AND antigen | #3 | | 'p 200':ab,ti OR p200:ab,ti OR 'anti p200':ab,ti OR 'anti p 200':ab,ti | #2 | | pemphigoid:ab,ti | #1 | |
| **Literature search scheme for Web of Science (99 results)**  **Search String:** |
| | #6 OR #5 OR #4 OR #3 OR #2 OR #1 | # 7 | | --- | --- | | Indexes=SCI-EXPANDED, SSCI, A&HCI, ESCI Timespan=All years |  | |  | 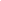   |  | | --- | | | TI=(("Anti-laminin gamma1" OR "antilaminin gamma1" OR "Antilaminin-gamma1" OR "Anti-laminin-gamma1" OR "Anti-laminin-gamma 1" OR "Anti-laminin gamma 1" OR "Antilaminin-gamma 1" OR "Antilaminin gamma 1" OR "anti-laminin-gamma-1" OR "Antilaminin-gamma-1" OR "Antilaminin gamma-1") NEAR/2 Pemphigoid) OR (TS=(("Anti-laminin gamma1" OR "antilaminin gamma1" OR "Antilaminin-gamma1" OR "Anti-laminin-gamma1" OR "Anti-laminin-gamma 1" OR "Anti-laminin gamma 1" OR "Antilaminin-gamma 1" OR "Antilaminin gamma 1" OR "anti-laminin-gamma-1" OR "Antilaminin-gamma-1" OR "Antilaminin gamma-1") NEAR/2 Pemphigoid)) | # 6 | | Indexes=SCI-EXPANDED, SSCI, A&HCI, ESCI Timespan=All years |  | |  | 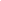   |  | | --- | | | TI=(("laminin gamma1" OR "Laminin-gamma1 " OR "laminin gamma-1" OR "laminin gamma 1" OR "Laminin-gamma 1" OR "Laminin-gamma-1") NEAR/2 pemphigoid) OR TS=(("laminin gamma1" OR "Laminin-gamma1 " OR "laminin gamma-1" OR "laminin gamma 1" OR "Laminin-gamma 1" OR "Laminin-gamma-1") NEAR/2 pemphigoid) | # 5 | | Indexes=SCI-EXPANDED, SSCI, A&HCI, ESCI Timespan=All years |  | |  | 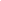   |  | | --- | | | TI=(laminin NEAR/4 gamma-1 NEAR/4 pemphigoid) OR TS=(laminin NEAR/4 gamma-1 NEAR/4 pemphigoid) | # 4 | | Indexes=SCI-EXPANDED, SSCI, A&HCI, ESCI Timespan=All years |  | |  | 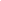   |  | | --- | | | TI=((200-kD dermal antigen) OR (200 kd dermal antigen) OR (dermal 200-kD antigen) OR (dermal 200 kD antigen) OR (200-kD dermal-antigen) OR (200 kD dermal-antigen)) OR TS=((200-kD dermal antigen) OR (200 kd dermal antigen) OR (dermal 200-kD antigen) OR (dermal 200 kD antigen) OR (200-kD dermal-antigen) OR (200 kD dermal-antigen)) | # 3 | | Indexes=SCI-EXPANDED, SSCI, A&HCI, ESCI Timespan=All years |  | |  | 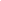   |  | | --- | | | TI=((Anti-p200 OR "Anti p200" OR "Anti p-200" OR "Anti-p 200" OR Anti-p-200) NEAR/2 pemphigoid) OR TS=((Anti-p200 OR "Anti p200" OR "Anti p-200" OR "Anti-p 200" OR Anti-p-200) NEAR/2 pemphigoid) | # 2 | | Indexes=SCI-EXPANDED, SSCI, A&HCI, ESCI Timespan=All years |  | |  | 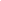   |  | | --- | | | TI=((p200 OR "p 200" OR p-200) NEAR/2 pemphigoid) OR TS=((p200 OR "p 200" OR p-200) NEAR/2 pemphigoid) | # 1 | |
